# Supplementary material
Source: PubMed Central journal article supplement (PMC2710013)
Supplement: mmc1.pdf [file mmc1.pdf]

Biophysical Journal, Volume 96

**Supplementary Material**

**Single-Molecule Imaging of a Fluorescent Unnatural Amino Acid Incorporated into Nicotinic Receptors**

Rigo Pantoja, Erik A. Rodriguez, Mohammed I. Dibas, Dennis A. Dougherty, and Henry A. Lester

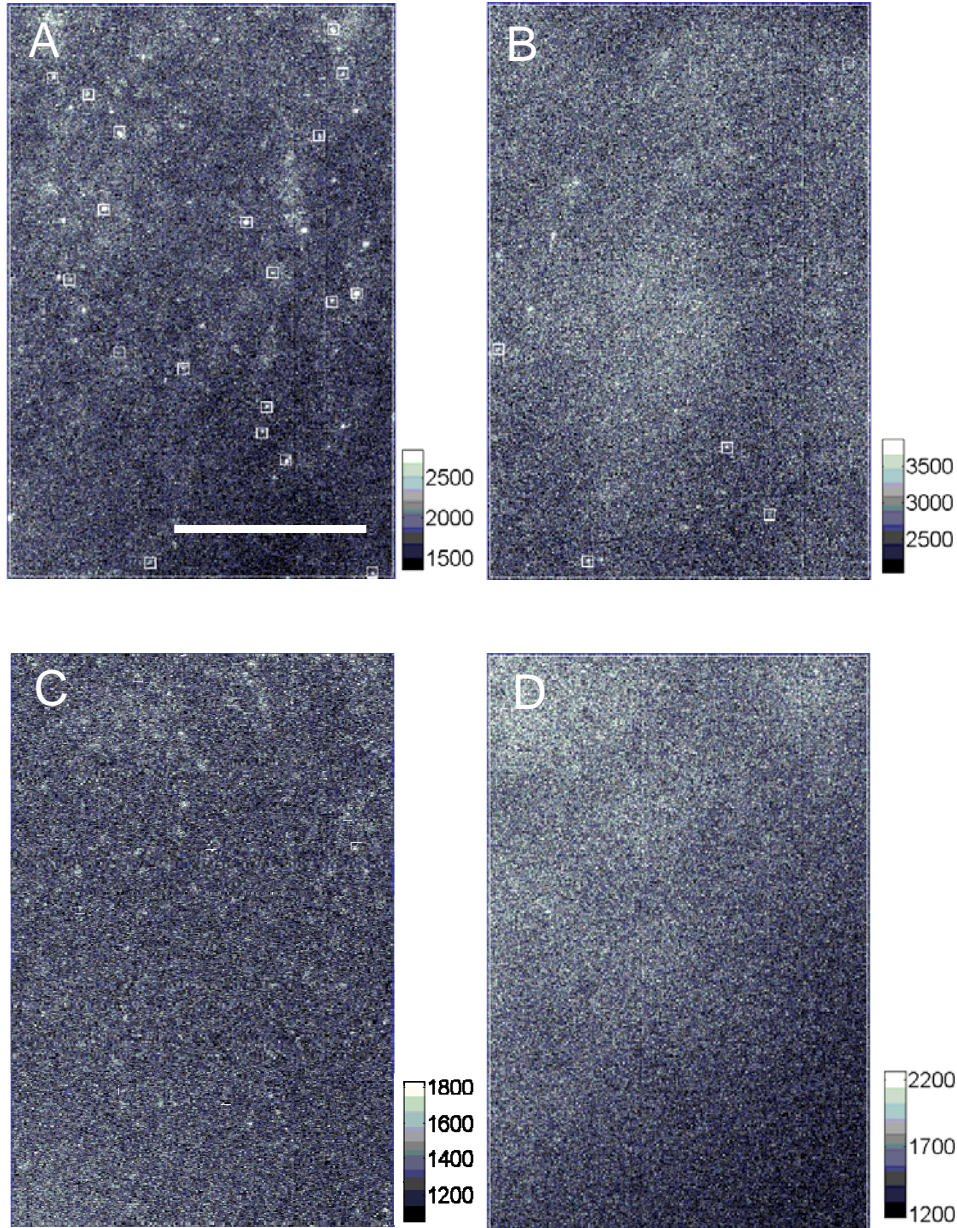

Figure 1. TIRF microscopy images from oocytes expressing fluorescent nAChRs and control oocytes. The rectangles denote puncta which satisfied the point spread function of our microscope and were analyzed for photobleaching events. The images are false colored. The intensity counts calibration bar displays a linear range with 1% of the outlier counts excluded for optimal visualization purposes. The scale bar applies to all images and represents 6  $\mu\text{m}$ .

- (A) An oocyte expressing nAChR  $\beta 19'$ Lys(BODIPYFL).
- (B) A control oocyte injected with YFaFS<sub>ACCC</sub>-Lys(BODIPYFL).
- (C) An oocyte expressing nAChR  $\gamma_{eGFP}$ .
- (D) An unlabeled and uninjected oocyte.

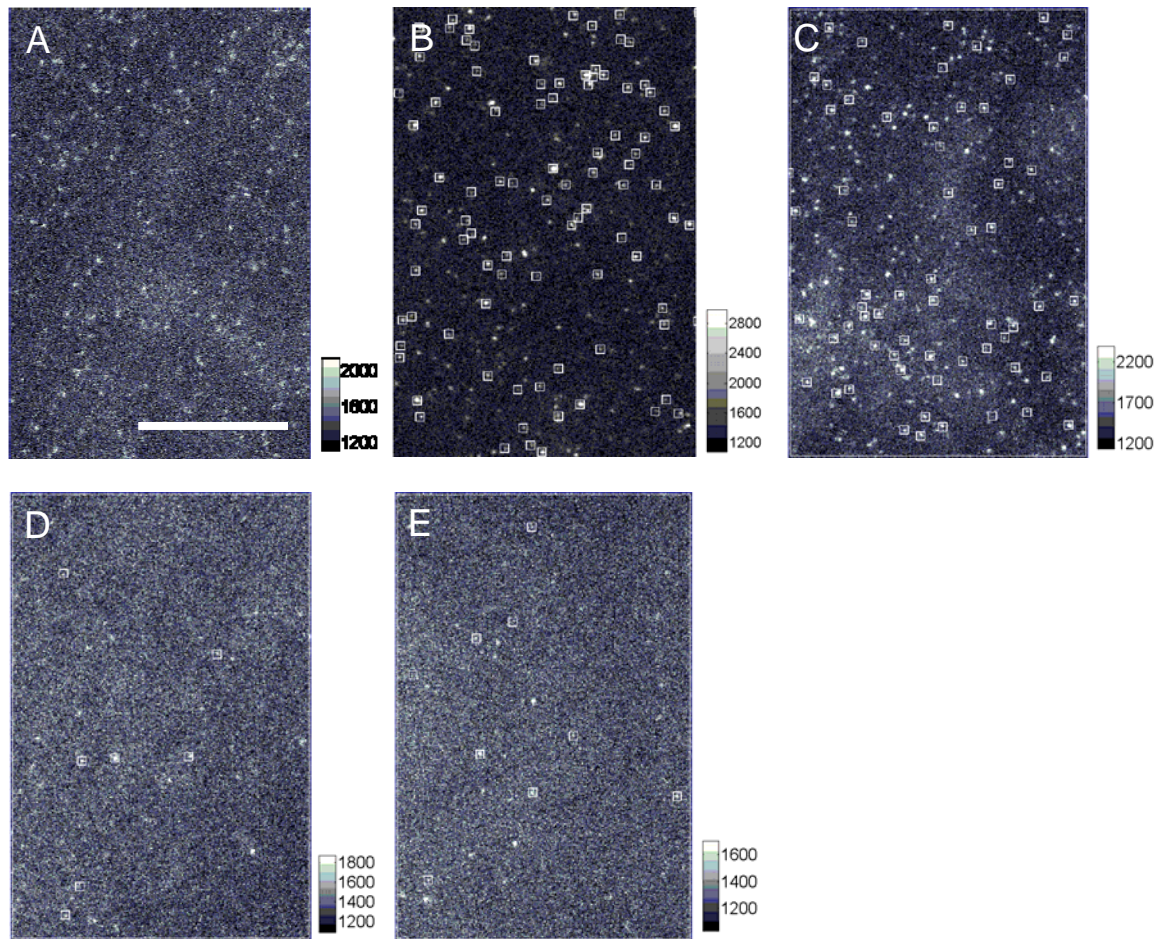

Figure 2. TIRF microscopy images from oocytes incubated with  $\alpha$ BtxAlexa488. The rectangles denote puncta which satisfied the point spread function of our microscope and were analyzed for photobleaching events. The images are false colored. The intensity counts calibration bar displays a linear range with 1% of the outlier counts excluded for optimal visualization purposes. The scale bar applies to all images and represents 6  $\mu$ m.

(A) An oocyte expressing WT nAChRs.  
 (B) An oocyte expressing nAChR  $\gamma_{\text{GFP}}$ .  
 (C) An oocyte expressing nAChR  $\beta 19^{\text{Lys}}$ (BODIPYFL).  
 (D) A control oocyte injected with YFaFS<sub>ACCC</sub>-Lys(BODIPYFL).  
 (E) An uninjected oocyte.
